# Supplementary material for: Hip Fractures in Elderly People: Surgery or No Surgery? A Systematic Review and Meta-Analysis
Source: PubMed Central journal article supplement — Geriatr Orthop Surg Rehabil. 2017 Jul 7;8(3):173–80. doi: 10.1177/2151458517713821 (PMC5557195; doi:10.1177/2151458517713821), 2017-07-07
Supplement: Supplemental_Appendix_1.pdf [file Supplemental_Appendix_1.pdf]

**Supplemental Appendix 1. Search strategy 27 may 2015**

| <b>Database</b>                     | <b>Total</b> | <b>Deduplicated</b> |
|-------------------------------------|--------------|---------------------|
| <i>Embase.com (Embase, Medline)</i> | 815          | 806                 |
| <i>Medline (OVID)</i>               | 437          | 122                 |
| <i>PubMed supplied by publisher</i> | 3            | 1                   |
| <i>Cochrane Central</i>             | 11           | 1                   |
| <i>Web of Science</i>               | 215          | 64                  |
| <b>Total</b>                        | <b>1481</b>  | <b>994</b>          |

**Embase (Embase, Medline) 815 (806)**

('hip fracture'/exp OR ((hip OR femor\* OR femur\* OR collum\* OR trochant\* OR subtroch\* OR intertroch\* OR pertroch\*) NEAR/3 fractur\*):ab,ti) AND ('aged'/exp OR 'geriatric patient'/de OR 'geriatrics'/de OR 'elderly care'/exp OR 'geriatric hospital'/de OR 'geriatric rehabilitation'/de OR ((aged OR old\* OR elder\*):ab,ti NOT (child/exp OR adolescent/de OR (child\* OR adolescen\* OR teen\* OR youth\*):ab,ti)) OR (senior\* OR geriatr\* OR psychogeriatr\* OR septuagenarian\* OR octogenarian\* OR nonagenarian\* OR centenarian\* OR supercentenarian\*):ab,ti) AND ('surgery'/exp OR (surg\* OR operat\* OR orthop\* OR fixat\* OR arthroplast\* OR hemiarthroplast\* OR prosth\* OR replac\* OR Girdlestone OR screw\*):ab,ti) AND ('conservative treatment'/exp OR (conservat\* OR nonsurg\* OR nonoperativ\* OR (non NEXT/1 (operat\* OR surg\*)) OR traction\* OR bedrest OR (bed NEXT/1 rest\*) OR (watch\* NEAR/3 wait\*)):ab,ti) AND ('treatment outcome'/exp OR 'mortality'/exp OR 'morbidity'/de OR 'quality of life'/exp OR 'cost benefit analysis'/de OR 'health status'/exp OR ((qualit\* NEAR/3 (life OR living)) OR QALY OR QOL OR outcome\* OR mortalit\* OR death\* OR morbid\* OR failure\* OR fitness\* OR function\* OR mobil\* OR cost\* OR ASA):ab,ti)

**Ovid SP (Medline) 437 (122)**

(exp "hip fractures"/ OR ((hip OR femor\* OR femur\* OR collum\* OR trochant\* OR subtroch\* OR intertroch\* OR pertroch\*) ADJ3 fractur\*):ab,ti) AND (exp "aged"/ OR "geriatrics"/ OR ((aged OR old\* OR elder\*):ab,ti NOT (exp child/ OR adolescent/ OR (child\* OR adolescen\* OR teen\* OR youth\*):ab,ti)) OR (senior\* OR geriatr\* OR psychogeriatr\* OR septuagenarian\* OR octogenarian\* OR nonagenarian\* OR centenarian\* OR supercentenarian\*):ab,ti) AND (exp "Surgical Procedures, Operative"/ OR surgery.xs. OR (surg\* OR operat\* OR orthop\* OR fixat\* OR arthroplast\* OR hemiarthroplast\* OR prosth\* OR replac\* OR Girdlestone OR screw\*):ab,ti) AND ("bed rest"/ OR (conservat\* OR nonsurg\* OR nonoperativ\* OR (non ADJ (operat\* OR surg\*)) OR traction\* OR bedrest OR (bed ADJ rest\*) OR (watch\* ADJ3 wait\*)):ab,ti) AND (exp "treatment outcome"/ OR exp "mortality"/ OR mortality.xs. OR exp "morbidity"/ OR "quality of life"/ OR "cost benefit analysis"/ OR exp "health status"/ OR ((qualit\* ADJ3 (life OR living)) OR QALY OR QOL OR outcome\* OR mortalit\* OR death\* OR morbid\* OR failure\* OR fitness\* OR function\* OR mobil\* OR cost\* OR ASA):ab,ti)

**PubMed as supplied by publisher: 3 (1)**

((hip[tiab] OR femor\*[tiab] OR femur\*[tiab] OR collum\*[tiab] OR trochant\*[tiab] OR subtroch\*[tiab] OR intertroch\*[tiab] OR pertroch\*[tiab]) AND fractur\*[tiab]) AND (((aged[tiab] OR old\*[tiab] OR elder\*[tiab]) NOT (child\*[tiab] OR adolescen\*[tiab] OR teen\*[tiab] OR youth\*[tiab])) OR senior\*[tiab] OR geriatr\*[tiab] OR psychogeriatr\*[tiab] OR septuagenarian\*[tiab] OR octogenarian\*[tiab] OR nonagenarian\*[tiab] OR centenarian\*[tiab] OR supercentenarian\*[tiab]) AND (surger\*[tiab] OR surgic\*[tiab] OR operation\*[tiab] OR operative\*[tiab] OR orthop\*[tiab] OR fixat\*[tiab] OR arthroplast\*[tiab] OR hemiarthroplast\*[tiab] OR prosth\*[tiab] OR replac\*[tiab] OR Girdlestone[tiab] OR screw\*[tiab]) AND (conservat\*[tiab] OR nonsurg\*[tiab] OR nonoperativ\*[tiab] OR non operat\*[tiab] OR non surg\*[tiab] OR traction\*[tiab] OR bedrest[tiab] OR bed rest\*[tiab] OR (watch\*[tiab] AND wait\*[tiab])) AND ((qualit\*[tiab] AND (life[tiab] OR living[tiab])) OR QALY[tiab] OR QOL[tiab] OR outcome\*[tiab] OR mortalit\*[tiab] OR death\*[tiab] OR morbid\*[tiab] OR failur\*[tiab] OR fitness\*[tiab] OR functional\*[tiab] OR function[tiab] OR functions[tiab] OR functioning[tiab] OR mobil\*[tiab] OR cost[tiab] OR costs[tiab] OR ASA[tiab]) AND publisher[sb])

**Cochrane Central 11 (0)**

((hip OR femor\* OR femur\* OR collum\* OR trochant\* OR subtroch\* OR intertroch\* OR pertroch\*) NEAR/3 fractur\*):ab,ti) AND (((aged OR old\* OR elder\*):ab,ti NOT ((child\* OR adolescen\* OR teen\* OR youth\*):ab,ti)) OR (senior\* OR geriatr\* OR psychogeriatr\* OR septuagenarian\* OR octogenarian\* OR nonagenarian\* OR centenarian\* OR supercentenarian\*):ab,ti) AND ((surg\* OR operat\* OR orthop\* OR fixat\* OR arthroplast\* OR hemiarthroplast\* OR prosth\* OR replac\* OR Girdlestone OR screw\*):ab,ti) AND ((conservat\* OR nonsurg\* OR nonoperativ\* OR (non NEXT/1 (operat\* OR surg\*)) OR traction\* OR bedrest OR (bed NEXT/1 rest\*) OR (watch\* NEAR/3 wait\*)):ab,ti) AND (((qualit\* NEAR/3 (life OR living)) OR QALY OR QOL OR outcome\* OR mortalit\* OR death\* OR morbid\* OR failure\* OR fitness\* OR function\* OR mobil\* OR cost\* OR ASA):ab,ti)

**WOS: 215 (64)**

TS=(((hip OR femor\* OR femur\* OR collum\* OR trochant\* OR subtroch\* OR intertroch\* OR pertroch\*) NEAR/3 fractur\*)) AND (((aged OR old\* OR elder\*) NOT ((child\* OR adolescen\* OR teen\* OR youth\*))) OR (senior\* OR geriatr\* OR psychogeriatr\* OR septuagenarian\* OR octogenarian\* OR nonagenarian\* OR centenarian\* OR supercentenarian\*)) AND ((surg\* OR operat\* OR orthop\* OR fixat\* OR arthroplast\* OR hemiarthroplast\* OR prosth\* OR replac\* OR Girdlestone OR screw\*)) AND ((conservat\* OR nonsurg\* OR nonoperativ\* OR (non NEXT/1 (operat\* OR surg\*)) OR traction\* OR bedrest OR (bed NEXT/1 rest\*) OR (watch\* NEAR/3 wait\*)) AND (((qualit\* NEAR/3 (life OR living)) OR QALY OR QOL OR outcome\* OR mortalit\* OR death\* OR morbid\* OR failure\* OR fitness\* OR function\* OR mobil\* OR cost\* OR ASA)))
